# Supplementary material for: Genetic Diversity of Hatchery-Bred Brown Trout (Salmo trutta) Compared with the Wild Population: Potential Effects of Stocking on the Indigenous Gene Pool of a Norwegian Reservoir
Source: MDPI journal article supplement (doi:10.3390/d13090414), 2021-08-29
Supplement: s1 [file s1]

Archive with 4 entries (4 files):
- Table S2.pdf
- Table S3.pdf
- Table S4.pdf
- Table.S1.pdf
