# Supplementary material for: Genetic Diversity of Hatchery-Bred Brown Trout (Salmo trutta) Compared with the Wild Population: Potential Effects of Stocking on the Indigenous Gene Pool of a Norwegian Reservoir
Source: MDPI journal article supplement (doi:10.3390/d13090414), 2021-08-29
Supplement: s1 [file s1 › Table S2.pdf]

Results from GENEPOP  
 Sun Dec 30 17:04:09 AWST 2018

Genepop version 4.2, Genotypic linkage disequilibrium

File: 170409 (Title line:"10.pop.3D.GenPop")

Number of populations detected : 10

Number of loci detected : 8

Markov chain parameters

Dememorisation : 1000

Batches : 100

Iterations per batch : 1000

| Orig.line no.<br>S.E. | Pop    | Locus#1          | Locus#2          | P-Value |
|-----------------------|--------|------------------|------------------|---------|
| 191                   | Mog.08 | SSaD170 STR73INR | 0.00736 0.002697 | 5904 1  |
| 177                   | Mog.08 | SSaD190 SSaD85   | 0.00956 0.005462 | 2580 2  |
| 188                   | Mog.08 | SSaD85 SSa85     | 0.00973 0.003342 | 6704 3  |
| 195                   | Mog.08 | Brun13 STR73INR  | 0.0125 0.004749  | 5706 4  |
| 196                   | Mog.08 | SSa85 STR73INR   | 0.05573 0.006066 | 16533   |
| 174                   | Mog.08 | SSaD190 SSaD71   | 0.05791 0.019258 | 1484 6  |
| 185                   | Mog.08 | SSaD170 SSa85    | 0.07031 0.015362 | 4234 7  |
| 171                   | Mog.08 | SSaD170 SSaD190  | 0.08667 0.022405 | 1418 8  |
| 193                   | Mog.08 | SSaD71 STR73INR  | 0.18885 0.020208 | 6106    |
| 194                   | Mog.08 | SSaD85 STR73INR  | 0.31614 0.020226 | 9414    |
| 184                   | Mog.08 | SSa197 SSa85     | 0.36296 0.019728 | 7662 11 |
| 178                   | Mog.08 | SSaD71 SSaD85    | 0.38348 0.039284 | 1801 12 |
| 172                   | Mog.08 | SSa197 SSaD71    | 0.38521 0.037419 | 2049 13 |
| 189                   | Mog.08 | Brun13 SSa85     | 0.39554 0.02809  | 4003 14 |
| 182                   | Mog.08 | SSaD71 Brun13    | 0.42634 0.043318 | 796 15  |
| 173                   | Mog.08 | SSaD170 SSaD71   | 0.43288 0.043488 | 889 16  |
| 176                   | Mog.08 | SSaD170 SSaD85   | 0.43406 0.040573 | 1726 17 |
| 170                   | Mog.08 | SSa197 SSaD190   | 0.47872 0.035138 | 2923 18 |
| 181                   | Mog.08 | SSaD190 Brun13   | 0.52211 0.039695 | 1272 19 |
| 169                   | Mog.08 | SSa197 SSaD170   | 0.52464 0.036953 | 2055 20 |
| 190                   | Mog.08 | SSa197 STR73INR  | 0.56781 0.016522 | 10644   |
| 186                   | Mog.08 | SSaD190 SSa85    | 0.58105 0.025618 | 5520 22 |
| 175                   | Mog.08 | SSa197 SSaD85    | 0.59875 0.030016 | 3612 23 |
| 180                   | Mog.08 | SSaD170 Brun13   | 0.61267 0.043821 | 788 24  |
| 183                   | Mog.08 | SSaD85 Brun13    | 0.70902 0.035522 | 1614 25 |
| 187                   | Mog.08 | SSaD71 SSa85     | 0.77424 0.022436 | 4379 26 |
| 192                   | Mog.08 | SSaD190 STR73INR | 0.91961 0.010407 | 7659    |
| 179                   | Mog.08 | SSa197 Brun13    | 0.93347 0.018296 | 1905 28 |

| nr  | Pop    | Locus#1 | Locus#2  | P-Value | S.E.     | Switches | LD    |    |
|-----|--------|---------|----------|---------|----------|----------|-------|----|
| 146 | Sag.08 | SSaD190 | SSaD71   | 0       | 0        | 1770 1   | 1     |    |
| 153 | Sag.08 | SSaD190 | Brun13   | 0       | 0        | 1673 2   | 2     |    |
| 143 | Sag.08 | SSaD170 | SSaD190  | 0.00049 | 0.00049  | 1394 3   | 3     |    |
| 168 | Sag.08 | SSa85   | STR73INR |         | 0.00214  | 0.001122 | 10533 | 4  |
| 4   |        |         |          |         |          |          |       |    |
| 155 | Sag.08 | SSaD85  | Brun13   | 0.00721 | 0.003844 | 1805     | 5     | 5  |
| 150 | Sag.08 | SSaD71  | SSaD85   | 0.0156  | 0.005208 | 1875     | 6     | 6  |
| 152 | Sag.08 | SSaD170 | Brun13   | 0.02071 | 0.009687 | 1360     | 7     | 7  |
| 161 | Sag.08 | Brun13  | SSa85    | 0.02236 | 0.011202 | 2585     | 8     | 8  |
| 149 | Sag.08 | SSaD190 | SSaD85   | 0.03907 | 0.015438 | 1888     | 9     | 9  |
| 154 | Sag.08 | SSaD71  | Brun13   | 0.06185 | 0.019635 | 1692     |       | 10 |
| 144 | Sag.08 | SSa197  | SSaD71   | 0.08858 | 0.020455 | 1741     |       | 11 |
| 156 | Sag.08 | SSa197  | SSa85    | 0.10689 | 0.021609 | 2675     |       | 12 |
| 151 | Sag.08 | SSa197  | Brun13   | 0.14733 | 0.028803 | 1644     |       | 13 |
| 145 | Sag.08 | SSaD170 | SSaD71   | 0.20146 | 0.032661 | 1414     |       | 14 |
| 147 | Sag.08 | SSa197  | SSaD85   | 0.2314  | 0.03297  | 1797     | 15    |    |
| 164 | Sag.08 | SSaD190 | STR73INR |         | 0.32198  | 0.022699 | 7774  |    |
| 16  |        |         |          |         |          |          |       |    |
| 162 | Sag.08 | SSa197  | STR73INR |         | 0.33922  | 0.023251 | 7679  |    |
| 17  |        |         |          |         |          |          |       |    |
| 158 | Sag.08 | SSaD190 | SSa85    | 0.36931 | 0.034138 | 2574     |       | 18 |
| 167 | Sag.08 | Brun13  | STR73INR |         | 0.38149  | 0.022631 | 7788  |    |
| 19  |        |         |          |         |          |          |       |    |
| 165 | Sag.08 | SSaD71  | STR73INR |         | 0.42373  | 0.02477  | 7511  | 20 |
| 157 | Sag.08 | SSaD170 | SSa85    | 0.43673 | 0.038277 | 2215     |       | 21 |
| 142 | Sag.08 | SSa197  | SSaD190  | 0.45225 | 0.039276 | 1636     |       | 22 |
| 163 | Sag.08 | SSaD170 | STR73INR |         | 0.48756  | 0.024797 | 6827  |    |
| 23  |        |         |          |         |          |          |       |    |
| 166 | Sag.08 | SSaD85  | STR73INR |         | 0.52743  | 0.022116 | 8311  |    |
| 24  |        |         |          |         |          |          |       |    |
| 141 | Sag.08 | SSa197  | SSaD170  | 0.58021 | 0.039465 | 1382     |       | 25 |
| 148 | Sag.08 | SSaD170 | SSaD85   | 0.70979 | 0.037881 | 1492     |       | 26 |
| 159 | Sag.08 | SSaD71  | SSa85    | 0.81764 | 0.024882 | 2716     |       | 27 |
| 160 | Sag.08 | SSaD85  | SSa85    | 0.87168 | 0.021429 | 2913     |       | 28 |
| 199 | Sag.11 | SSaD170 | SSaD190  | 0.0005  | 0.0005   | 1732 1   | 1     |    |
| 209 | Sag.11 | SSaD190 | Brun13   | 0.00575 | 0.00376  | 4142 2   | 2     |    |
| 213 | Sag.11 | SSaD170 | SSa85    | 0.00588 | 0.003342 | 3149 3   | 3     | 3  |
| 224 | Sag.11 | SSa85   | STR73INR |         | 0.01014  | 0.002131 | 16078 | 4  |
| 4   |        |         |          |         |          |          |       |    |
| 221 | Sag.11 | SSaD71  | STR73INR |         | 0.01214  | 0.00349  | 15081 | 5  |
| 206 | Sag.11 | SSaD71  | SSaD85   | 0.01843 | 0.008644 | 3917     | 6     | 6  |
| 202 | Sag.11 | SSaD190 | SSaD71   | 0.02116 | 0.00608  | 5668 7   | 7     |    |
| 212 | Sag.11 | SSa197  | SSa85    | 0.0683  | 0.013815 | 5755     |       | 8  |
| 214 | Sag.11 | SSaD190 | SSa85    | 0.07147 | 0.012082 | 6459     |       | 9  |
| 210 | Sag.11 | SSaD71  | Brun13   | 0.07708 | 0.013472 | 5541     |       | 10 |
| 208 | Sag.11 | SSaD170 | Brun13   | 0.08076 | 0.019658 | 1855     |       | 11 |
| 203 | Sag.11 | SSa197  | SSaD85   | 0.09119 | 0.017061 | 2830     |       | 12 |
| 215 | Sag.11 | SSaD71  | SSa85    | 0.09267 | 0.015236 | 8752     |       | 13 |
| 216 | Sag.11 | SSaD85  | SSa85    | 0.17811 | 0.021952 | 4605     |       | 14 |
| 198 | Sag.11 | SSa197  | SSaD190  | 0.19112 | 0.025126 | 3883     |       | 15 |
| 217 | Sag.11 | Brun13  | SSa85    | 0.19667 | 0.019172 | 6631     |       | 16 |
| 207 | Sag.11 | SSa197  | Brun13   | 0.31529 | 0.025432 | 3963     |       | 17 |
| 197 | Sag.11 | SSa197  | SSaD170  | 0.33191 | 0.034299 | 1881     |       | 18 |

|     |            |         |          |         |          |          |       |    |
|-----|------------|---------|----------|---------|----------|----------|-------|----|
| 211 | Sag.11     | SSaD85  | Brun13   | 0.34152 | 0.032571 | 2857     |       | 19 |
| 220 | Sag.11     | SSaD190 | STR73INR |         | 0.3565   | 0.019717 | 11865 |    |
| 20  |            |         |          |         |          |          |       |    |
| 223 | Sag.11     | Brun13  | STR73INR |         | 0.37973  | 0.017965 | 11782 |    |
| 21  |            |         |          |         |          |          |       |    |
| 204 | Sag.11     | SSaD170 | SSaD85   | 0.40187 | 0.041081 | 1240     |       | 22 |
| 219 | Sag.11     | SSaD170 | STR73INR |         | 0.4535   | 0.028582 | 6421  |    |
| 23  |            |         |          |         |          |          |       |    |
| 218 | Sag.11     | SSa197  | STR73INR |         | 0.58284  | 0.018998 | 10094 |    |
| 24  |            |         |          |         |          |          |       |    |
| 200 | Sag.11     | SSa197  | SSaD71   | 0.62958 | 0.026142 | 5075     |       | 25 |
| 205 | Sag.11     | SSaD190 | SSaD85   | 0.64497 | 0.033916 | 2834     |       | 26 |
| 201 | Sag.11     | SSaD170 | SSaD71   | 0.75345 | 0.030268 | 2504     |       | 27 |
| 222 | Sag.11     | SSaD85  | STR73INR |         | 0.85045  | 0.014389 | 9069  |    |
| 28  |            |         |          |         |          |          |       |    |
| 245 | Sag.12     | Brun13  | SSa85    | 0.00846 | 0.003773 | 3643     | 1     | 1  |
| 237 | Sag.12     | SSaD190 | Brun13   | 0.01403 | 0.006161 | 1890     | 2     | 2  |
| 228 | Sag.12     | SSa197  | SSaD71   | 0.01419 | 0.004747 | 4284     | 3     | 3  |
| 248 | Sag.12     | SSaD190 | STR73INR |         | 0.023    | 0.005312 | 8152  | 4  |
| 4   |            |         |          |         |          |          |       |    |
| 241 | Sag.12     | SSaD170 | SSa85    | 0.03001 | 0.009582 | 3031     | 5     | 5  |
| 227 | Sag.12     | SSaD170 | SSaD190  | 0.04432 | 0.01421  | 1470     | 6     |    |
| 229 | Sag.12     | SSaD170 | SSaD71   | 0.05385 | 0.018231 | 2007     |       | 7  |
| 242 | Sag.12     | SSaD190 | SSa85    | 0.0761  | 0.015176 | 4619     |       | 8  |
| 235 | Sag.12     | SSa197  | Brun13   | 0.12097 | 0.023001 | 2837     |       | 9  |
| 238 | Sag.12     | SSaD71  | Brun13   | 0.12615 | 0.023689 | 2453     |       | 10 |
| 244 | Sag.12     | SSaD85  | SSa85    | 0.13234 | 0.018788 | 3714     |       | 11 |
| 232 | Sag.12     | SSaD170 | SSaD85   | 0.13341 | 0.028696 | 1076     |       | 12 |
| 226 | Sag.12     | SSa197  | SSaD190  | 0.15944 | 0.022575 | 3798     |       | 13 |
| 234 | Sag.12     | SSaD71  | SSaD85   | 0.16245 | 0.025764 | 2350     |       | 14 |
| 225 | Sag.12     | SSa197  | SSaD170  | 0.18816 | 0.028158 | 2391     |       | 15 |
| 230 | Sag.12     | SSaD190 | SSaD71   | 0.19764 | 0.027065 | 3073     |       | 16 |
| 236 | Sag.12     | SSaD170 | Brun13   | 0.2183  | 0.032929 | 1183     |       | 17 |
| 233 | Sag.12     | SSaD190 | SSaD85   | 0.23583 | 0.034313 | 1777     |       | 18 |
| 251 | Sag.12     | Brun13  | STR73INR |         | 0.35344  | 0.026149 | 6178  |    |
| 19  |            |         |          |         |          |          |       |    |
| 249 | Sag.12     | SSaD71  | STR73INR |         | 0.44972  | 0.022292 | 8961  |    |
| 20  |            |         |          |         |          |          |       |    |
| 247 | Sag.12     | SSaD170 | STR73INR |         | 0.4558   | 0.02548  | 5519  | 21 |
| 240 | Sag.12     | SSa197  | SSa85    | 0.53413 | 0.024831 | 6163     |       | 22 |
| 243 | Sag.12     | SSaD71  | SSa85    | 0.5628  | 0.026808 | 5224     |       | 23 |
| 252 | Sag.12     | SSa85   | STR73INR |         | 0.60493  | 0.016133 | 12569 |    |
| 24  |            |         |          |         |          |          |       |    |
| 231 | Sag.12     | SSa197  | SSaD85   | 0.75365 | 0.028574 | 2787     |       | 25 |
| 246 | Sag.12     | SSa197  | STR73INR |         | 0.81665  | 0.014539 | 10113 |    |
| 26  |            |         |          |         |          |          |       |    |
| 239 | Sag.12     | SSaD85  | Brun13   | 0.89592 | 0.022426 | 1362     |       | 27 |
| 250 | Sag.12     | SSaD85  | STR73INR |         | 0.93099  | 0.012051 | 6524  |    |
| 28  |            |         |          |         |          |          |       |    |
| 3   | Sav.Rec.10 |         | SSaD170  | SSaD190 | 0        | 0        | 3886  | 1  |
| 4   | Sav.Rec.10 |         | SSa197   | SSaD71  | 0        | 0        | 3949  | 2  |
| 5   | Sav.Rec.10 |         | SSaD170  | SSaD71  | 0        | 0        | 2432  | 3  |
| 10  | Sav.Rec.10 |         | SSaD71   | SSaD85  | 0        | 0        | 5218  | 4  |
| 17  | Sav.Rec.10 |         | SSaD170  | SSa85   | 0        | 0        | 5065  | 5  |

|          |            |         |          |         |          |       |       |
|----------|------------|---------|----------|---------|----------|-------|-------|
| 23<br>6  | Sav.Rec.10 | SSaD170 | STR73INR | 0       | 0        | 5958  | 6     |
| 25<br>7  | Sav.Rec.10 | SSaD71  | STR73INR | 0       | 0        | 5440  | 7     |
| 7<br>9   | Sav.Rec.10 | SSa197  | SSaD85   | 0.00146 | 0.000612 | 8625  | 9     |
| 28<br>10 | Sav.Rec.10 | SSa85   | STR73INR | 0.00153 | 0.000643 |       | 10223 |
| 8<br>11  | Sav.Rec.10 | SSaD170 | SSaD85   | 0.00204 | 0.001179 | 5409  | 11    |
| 24<br>14 | Sav.Rec.10 | SSaD190 | STR73INR | 0.00507 | 0.00192  | 8310  | 14    |
| 19<br>16 | Sav.Rec.10 | SSaD71  | SSa85    | 0.01268 | 0.004962 | 4996  | 16    |
| 12<br>17 | Sav.Rec.10 | SSaD170 | Brun13   | 0.01473 | 0.007496 | 2186  | 17    |
| 14<br>19 | Sav.Rec.10 | SSaD71  | Brun13   | 0.01901 | 0.007805 | 2250  | 19    |
| 13<br>21 | Sav.Rec.10 | SSaD190 | Brun13   | 0.0212  | 0.007202 | 3495  | 21    |
| 6<br>23  | Sav.Rec.10 | SSaD190 | SSaD71   | 0.02528 | 0.010769 | 3742  | 23    |
| 9<br>27  | Sav.Rec.10 | SSaD190 | SSaD85   | 0.03474 | 0.006814 | 8131  | 27    |
| 22<br>32 | Sav.Rec.10 | SSa197  | STR73INR | 0.04166 | 0.006967 |       | 8524  |
| 16<br>33 | Sav.Rec.10 | SSa197  | SSa85    | 0.04393 | 0.007525 | 7541  | 33    |
| 1<br>34  | Sav.Rec.10 | SSa197  | SSaD170  | 0.05691 | 0.013793 | 3934  |       |
| 2<br>36  | Sav.Rec.10 | SSa197  | SSaD190  | 0.07118 | 0.009936 | 6058  |       |
| 21<br>37 | Sav.Rec.10 | Brun13  | SSa85    | 0.07892 | 0.012342 | 4867  |       |
| 26<br>39 | Sav.Rec.10 | SSaD85  | STR73INR | 0.09476 | 0.007999 |       | 11533 |
| 18<br>41 | Sav.Rec.10 | SSaD190 | SSa85    | 0.14909 | 0.013721 | 7444  |       |
| 27<br>44 | Sav.Rec.10 | Brun13  | STR73INR | 0.22697 | 0.023052 |       | 5291  |
| 11<br>46 | Sav.Rec.10 | SSa197  | Brun13   | 0.24738 | 0.023314 | 3675  |       |
| 15<br>54 | Sav.Rec.10 | SSaD85  | Brun13   | 0.54147 | 0.024159 | 5077  |       |
| 20<br>55 | Sav.Rec.10 | SSaD85  | SSa85    | 0.54572 | 0.014923 | 10392 |       |
| 110<br>1 | Hatch.09   | SSaD85  | STR73INR | 0.0078  | 0.001923 |       | 14624 |
| 86<br>2  | Hatch.09   | SSa197  | SSaD190  | 0.01176 | 0.003011 | 8246  | 2     |
| 103<br>3 | Hatch.09   | SSaD71  | SSa85    | 0.01226 | 0.001731 | 18655 | 3     |
| 87<br>4  | Hatch.09   | SSaD170 | SSaD190  | 0.01294 | 0.005996 | 4088  | 4     |

|           |          |                  |                      |       |    |
|-----------|----------|------------------|----------------------|-------|----|
| 96<br>5   | Hatch.09 | SSaD170 Brun13   | 0.01687 0.009072     | 1775  | 5  |
| 93<br>6   | Hatch.09 | SSaD190 SSaD85   | 0.04277 0.009316     | 7386  | 6  |
| 92<br>7   | Hatch.09 | SSaD170 SSaD85   | 0.05287 0.008537     | 5903  |    |
| 104<br>8  | Hatch.09 | SSaD85 SSa85     | 0.05656 0.004747     | 20713 |    |
| 85<br>9   | Hatch.09 | SSa197 SSaD170   | 0.07202 0.011986     | 5316  |    |
| 95<br>10  | Hatch.09 | SSa197 Brun13    | 0.07709 0.013474     | 3605  |    |
| 112<br>11 | Hatch.09 | SSa85 STR73INR   | 0.07828 0.004481     | 22893 |    |
| 97<br>12  | Hatch.09 | SSaD190 Brun13   | 0.08846 0.019743     | 2907  |    |
| 109<br>13 | Hatch.09 | SSaD71 STR73INR  | 0.10961 0.009666     | 10837 |    |
| 89<br>91  | Hatch.09 | SSaD170 SSaD71   | 0.11185 0.01613 4176 | 14    |    |
| 15        | Hatch.09 | SSa197 SSaD85    | 0.1193 0.011882      | 10081 |    |
| 106<br>16 | Hatch.09 | SSa197 STR73INR  | 0.1758 0.01053       | 14155 |    |
| 100<br>17 | Hatch.09 | SSa197 SSa85     | 0.18262 0.006663     | 22254 |    |
| 108<br>18 | Hatch.09 | SSaD190 STR73INR | 0.22392 0.01329      | 10123 |    |
| 107<br>19 | Hatch.09 | SSaD170 STR73INR | 0.22721 0.015868     | 8949  |    |
| 99<br>20  | Hatch.09 | SSaD85 Brun13    | 0.25066 0.025096     | 4424  |    |
| 94<br>21  | Hatch.09 | SSaD71 SSaD85    | 0.3426 0.014797      | 8078  |    |
| 88<br>22  | Hatch.09 | SSa197 SSaD71    | 0.37414 0.020299     | 7427  |    |
| 102<br>23 | Hatch.09 | SSaD190 SSa85    | 0.47907 0.015728     | 14227 |    |
| 101<br>24 | Hatch.09 | SSaD170 SSa85    | 0.52725 0.014706     | 12478 |    |
| 90<br>25  | Hatch.09 | SSaD190 SSaD71   | 0.62999 0.023859     | 5193  |    |
| 111<br>26 | Hatch.09 | Brun13 STR73INR  | 0.71942 0.020433     | 6592  |    |
| 98<br>27  | Hatch.09 | SSaD71 Brun13    | 0.85044 0.020827     | 2906  |    |
| 105<br>28 | Hatch.09 | Brun13 SSa85     | 0.8628 0.010408      | 11129 |    |
| 57        | Hatch.10 | SSa197 SSaD170   | 0 0 3121             | 8     | 8  |
| 58<br>12  | Hatch.10 | SSa197 SSaD190   | 0.00205 0.001016     | 6419  | 12 |
| 79<br>13  | Hatch.10 | SSaD170 STR73INR | 0.00458 0.001759     | 8278  |    |
| 73<br>15  | Hatch.10 | SSaD170 SSa85    | 0.00716 0.002954     | 4621  | 15 |

|     |          |         |          |         |          |          |       |
|-----|----------|---------|----------|---------|----------|----------|-------|
| 64  | Hatch.10 | SSaD170 | SSaD85   | 0.01645 | 0.009831 | 2045     | 18    |
| 18  |          |         |          |         |          |          |       |
| 83  | Hatch.10 | Brun13  | STR73INR |         | 0.02045  | 0.003679 | 12338 |
| 20  | 20       |         |          |         |          |          |       |
| 60  | Hatch.10 | SSa197  | SSaD71   | 0.02146 | 0.004572 | 6223     | 22    |
| 22  |          |         |          |         |          |          |       |
| 68  | Hatch.10 | SSaD170 | Brun13   | 0.0321  | 0.013164 | 2441     | 24    |
| 24  |          |         |          |         |          |          |       |
| 75  | Hatch.10 | SSaD71  | SSa85    | 0.03223 | 0.005218 | 8000     | 25    |
| 25  |          |         |          |         |          |          |       |
| 69  | Hatch.10 | SSaD190 | Brun13   | 0.03427 | 0.007338 | 5583     | 26    |
| 26  |          |         |          |         |          |          |       |
| 67  | Hatch.10 | SSa197  | Brun13   | 0.03556 | 0.009556 | 4914     | 28    |
| 28  |          |         |          |         |          |          |       |
| 72  | Hatch.10 | SSa197  | SSa85    | 0.03627 | 0.007846 | 7802     | 29    |
| 29  |          |         |          |         |          |          |       |
| 84  | Hatch.10 | SSa85   | STR73INR |         | 0.03791  | 0.004039 | 16785 |
| 30  | 30       |         |          |         |          |          |       |
| 76  | Hatch.10 | SSaD85  | SSa85    | 0.0395  | 0.006397 | 6021     | 31    |
| 31  |          |         |          |         |          |          |       |
| 61  | Hatch.10 | SSaD170 | SSaD71   | 0.07018 | 0.015379 | 3595     |       |
| 35  |          |         |          |         |          |          |       |
| 66  | Hatch.10 | SSaD71  | SSaD85   | 0.08877 | 0.013124 | 4670     |       |
| 38  |          |         |          |         |          |          |       |
| 63  | Hatch.10 | SSa197  | SSaD85   | 0.13347 | 0.016734 | 4212     |       |
| 40  |          |         |          |         |          |          |       |
| 77  | Hatch.10 | Brun13  | SSa85    | 0.21167 | 0.018047 | 7130     |       |
| 42  |          |         |          |         |          |          |       |
| 65  | Hatch.10 | SSaD190 | SSaD85   | 0.21307 | 0.020607 | 4587     |       |
| 43  |          |         |          |         |          |          |       |
| 82  | Hatch.10 | SSaD85  | STR73INR |         | 0.2293   | 0.016987 | 10272 |
|     | 45       |         |          |         |          |          |       |
| 62  | Hatch.10 | SSaD190 | SSaD71   | 0.26486 | 0.018008 | 6630     |       |
| 47  |          |         |          |         |          |          |       |
| 70  | Hatch.10 | SSaD71  | Brun13   | 0.27287 | 0.019618 | 5475     |       |
| 48  |          |         |          |         |          |          |       |
| 59  | Hatch.10 | SSaD170 | SSaD190  | 0.33606 | 0.031973 | 3335     |       |
| 49  |          |         |          |         |          |          |       |
| 74  | Hatch.10 | SSaD190 | SSa85    | 0.37293 | 0.017582 | 8491     |       |
| 50  |          |         |          |         |          |          |       |
| 71  | Hatch.10 | SSaD85  | Brun13   | 0.44286 | 0.029981 | 3548     |       |
| 51  |          |         |          |         |          |          |       |
| 78  | Hatch.10 | SSa197  | STR73INR |         | 0.46158  | 0.01608  | 13496 |
| 52  |          |         |          |         |          |          |       |
| 80  | Hatch.10 | SSaD190 | STR73INR |         | 0.52159  | 0.013382 | 14768 |
|     | 53       |         |          |         |          |          |       |
| 81  | Hatch.10 | SSaD71  | STR73INR |         | 0.88922  | 0.00719  | 13485 |
| 56  |          |         |          |         |          |          |       |
| 260 | Hatch.11 | SSaD170 | SSaD85   | 0       | 0        | 2446     | 1     |
| 262 | Hatch.11 | SSaD71  | SSaD85   | 0       | 0        | 2688     | 2     |
| 263 | Hatch.11 | SSa197  | Brun13   | 0       | 0        | 7042     | 3     |
| 264 | Hatch.11 | SSaD170 | Brun13   | 0       | 0        | 2561     | 4     |
| 266 | Hatch.11 | SSaD71  | Brun13   | 0       | 0        | 2676     | 5     |
| 267 | Hatch.11 | SSaD85  | Brun13   | 0       | 0        | 3603     | 6     |

|           |          |         |          |         |          |          |       |       |
|-----------|----------|---------|----------|---------|----------|----------|-------|-------|
| 265<br>7  | Hatch.11 | SSaD190 | Brun13   | 0.00207 | 0.000942 |          | 4609  | 7     |
| 271<br>8  | Hatch.11 | SSaD71  | SSa85    | 0.00326 | 0.002282 |          | 8468  | 8     |
| 256<br>9  | Hatch.11 | SSa197  | SSaD71   | 0.00428 | 0.002439 |          | 5601  | 9     |
| 253<br>10 | Hatch.11 | SSa197  | SSaD170  | 0.00511 | 0.003039 |          | 5306  | 10    |
| 257<br>11 | Hatch.11 | SSaD170 | SSaD71   | 0.02222 | 0.007915 |          | 1776  | 11    |
| 258<br>12 | Hatch.11 | SSaD190 | SSaD71   | 0.02726 | 0.009207 |          | 3585  | 12    |
| 277<br>13 | Hatch.11 | SSaD71  | STR73INR |         | 0.04515  | 0.00732  | 10095 | 13    |
| 259       | Hatch.11 | SSa197  | SSaD85   | 0.04742 | 0.00947  | 7250     | 14    | 14    |
| 273<br>15 | Hatch.11 | Brun13  | SSa85    | 0.05667 | 0.009842 |          | 9306  |       |
| 254<br>16 | Hatch.11 | SSa197  | SSaD190  | 0.07138 | 0.010766 |          | 8536  |       |
| 255<br>17 | Hatch.11 | SSaD170 | SSaD190  | 0.11241 | 0.019166 |          | 3321  |       |
| 272<br>18 | Hatch.11 | SSaD85  | SSa85    | 0.16153 | 0.016632 |          | 9079  |       |
| 274<br>19 | Hatch.11 | SSa197  | STR73INR |         | 0.18216  | 0.010636 |       | 18035 |
| 279<br>20 | Hatch.11 | Brun13  | STR73INR |         | 0.20299  | 0.014808 |       | 11058 |
| 269       | Hatch.11 | SSaD170 | SSa85    | 0.27547 | 0.02578  | 7175     |       | 21    |
| 275<br>22 | Hatch.11 | SSaD170 | STR73INR |         | 0.37168  | 0.018262 |       | 9313  |
| 268<br>23 | Hatch.11 | SSa197  | SSa85    | 0.38339 | 0.016703 |          | 16606 |       |
| 261<br>24 | Hatch.11 | SSaD190 | SSaD85   | 0.55826 | 0.031192 |          | 4524  |       |
| 280<br>25 | Hatch.11 | SSa85   | STR73INR |         | 0.69958  | 0.00997  | 18187 |       |
| 276       | Hatch.11 | SSaD190 | STR73INR |         | 0.70869  | 0.013719 |       | 14349 |
| 270<br>27 | Hatch.11 | SSaD190 | SSa85    | 0.72036 | 0.016509 |          | 11091 |       |
| 278<br>28 | Hatch.11 | SSaD85  | STR73INR |         | 0.79162  | 0.012421 |       | 11726 |
| 37        | SavV.10  | SSaD190 | SSaD85   | 0       | 0        | 1001     | 1     | 1     |
| 52        | SavV.10  | SSaD190 | STR73INR |         | 0.00441  | 0.00227  | 6106  | 2     |
| 40        | SavV.10  | SSaD170 | Brun13   | 0.05274 | 0.016672 |          | 664   | 3     |
| 48        | SavV.10  | SSaD85  | SSa85    | 0.05769 | 0.014106 |          | 1932  | 4     |
| 32        | SavV.10  | SSa197  | SSaD71   | 0.20561 | 0.033013 |          | 1376  | 5     |
| 41        | SavV.10  | SSaD190 | Brun13   | 0.20612 | 0.034657 |          | 891   | 6     |
| 30        | SavV.10  | SSa197  | SSaD190  | 0.23835 | 0.032739 |          | 1311  | 7     |
| 33        | SavV.10  | SSaD170 | SSaD71   | 0.24305 | 0.039157 |          | 888   | 8     |
| 35        | SavV.10  | SSa197  | SSaD85   | 0.27514 | 0.036721 |          | 1146  | 9     |
| 44        | SavV.10  | SSa197  | SSa85    | 0.31708 | 0.030329 |          | 2300  | 10    |
| 45        | SavV.10  | SSaD170 | SSa85    | 0.38258 | 0.035486 |          | 1529  | 11    |
| 29        | SavV.10  | SSa197  | SSaD170  | 0.48736 | 0.041995 |          | 933   | 12    |

|     |         |         |          |         |          |       |    |
|-----|---------|---------|----------|---------|----------|-------|----|
| 50  | SavV.10 | SSa197  | STR73INR | 0.48745 | 0.024648 | 6492  |    |
| 13  |         |         |          |         |          |       |    |
| 31  | SavV.10 | SSaD170 | SSaD190  | 0.52005 | 0.045721 | 792   | 14 |
| 46  | SavV.10 | SSaD190 | SSa85    | 0.52506 | 0.035042 | 2088  | 15 |
| 38  | SavV.10 | SSaD71  | SSaD85   | 0.53337 | 0.042177 | 1161  | 16 |
| 39  | SavV.10 | SSa197  | Brun13   | 0.54638 | 0.044076 | 1048  | 17 |
| 54  | SavV.10 | SSaD85  | STR73INR | 0.594   | 0.024113 | 5413  |    |
| 18  |         |         |          |         |          |       |    |
| 42  | SavV.10 | SSaD71  | Brun13   | 0.65868 | 0.041243 | 1054  | 19 |
| 56  | SavV.10 | SSa85   | STR73INR | 0.70329 | 0.017022 | 9242  |    |
| 20  |         |         |          |         |          |       |    |
| 53  | SavV.10 | SSaD71  | STR73INR | 0.74612 | 0.019048 | 6768  |    |
| 21  |         |         |          |         |          |       |    |
| 36  | SavV.10 | SSaD170 | SSaD85   | 0.78181 | 0.035539 | 742   | 22 |
| 51  | SavV.10 | SSaD170 | STR73INR | 0.81833 | 0.021009 | 4531  |    |
| 23  |         |         |          |         |          |       |    |
| 34  | SavV.10 | SSaD190 | SSaD71   | 0.85566 | 0.028552 | 1201  | 24 |
| 55  | SavV.10 | Brun13  | STR73INR | 0.89894 | 0.012807 | 5498  |    |
| 25  |         |         |          |         |          |       |    |
| 49  | SavV.10 | Brun13  | SSa85    | 0.93708 | 0.015403 | 1884  | 26 |
| 47  | SavV.10 | SSaD71  | SSa85    | 0.94424 | 0.013394 | 2339  | 27 |
| 43  | SavV.10 | SSaD85  | Brun13   | 1       | 0        | 795   | 28 |
| 137 | SavV.91 | SSaD71  | STR73INR | 0.01031 | 0.003885 | 6874  | 1  |
| 1   |         |         |          |         |          |       |    |
| 121 | SavV.91 | SSaD190 | SSaD85   | 0.05631 | 0.017845 | 1189  | 2  |
| 135 | SavV.91 | SSaD170 | STR73INR | 0.12198 | 0.016511 | 4738  |    |
| 3   |         |         |          |         |          |       |    |
| 128 | SavV.91 | SSa197  | SSa85    | 0.13405 | 0.020907 | 3769  | 4  |
| 132 | SavV.91 | SSaD85  | SSa85    | 0.25125 | 0.027241 | 2759  | 5  |
| 115 | SavV.91 | SSaD170 | SSaD190  | 0.38203 | 0.040145 | 931   | 6  |
| 136 | SavV.91 | SSaD190 | STR73INR | 0.39349 | 0.023642 | 6777  |    |
| 7   |         |         |          |         |          |       |    |
| 123 | SavV.91 | SSa197  | Brun13   | 0.4013  | 0.044542 | 946   | 8  |
| 140 | SavV.91 | SSa85   | STR73INR | 0.44531 | 0.015654 | 12169 |    |
| 9   |         |         |          |         |          |       |    |
| 119 | SavV.91 | SSa197  | SSaD85   | 0.45301 | 0.043358 | 1247  | 10 |
| 129 | SavV.91 | SSaD170 | SSa85    | 0.46027 | 0.034206 | 2463  | 11 |
| 118 | SavV.91 | SSaD190 | SSaD71   | 0.47224 | 0.038455 | 1795  | 12 |
| 131 | SavV.91 | SSaD71  | SSa85    | 0.48812 | 0.031715 | 4002  | 13 |
| 139 | SavV.91 | Brun13  | STR73INR | 0.54954 | 0.024441 | 4541  |    |
| 14  |         |         |          |         |          |       |    |
| 122 | SavV.91 | SSaD71  | SSaD85   | 0.60593 | 0.035792 | 1347  | 15 |
| 127 | SavV.91 | SSaD85  | Brun13   | 0.68607 | 0.041935 | 663   | 16 |
| 125 | SavV.91 | SSaD190 | Brun13   | 0.71164 | 0.036468 | 977   | 17 |
| 113 | SavV.91 | SSa197  | SSaD170  | 0.74038 | 0.035894 | 1122  | 18 |
| 124 | SavV.91 | SSaD170 | Brun13   | 0.74105 | 0.040861 | 545   | 19 |
| 133 | SavV.91 | Brun13  | SSa85    | 0.75076 | 0.032551 | 2346  | 20 |
| 134 | SavV.91 | SSa197  | STR73INR | 0.78554 | 0.016725 | 6818  |    |
| 21  |         |         |          |         |          |       |    |
| 126 | SavV.91 | SSaD71  | Brun13   | 0.81166 | 0.034302 | 1077  | 22 |
| 117 | SavV.91 | SSaD170 | SSaD71   | 0.92084 | 0.018208 | 1143  | 23 |
| 114 | SavV.91 | SSa197  | SSaD190  | 0.92794 | 0.017434 | 1639  | 24 |
| 116 | SavV.91 | SSa197  | SSaD71   | 0.95827 | 0.013803 | 1891  | 25 |
| 138 | SavV.91 | SSaD85  | STR73INR | 0.98489 | 0.003985 | 5052  |    |

|         |         |        |         |          |      |    |
|---------|---------|--------|---------|----------|------|----|
| SavV.91 | SSaD190 | SSa85  | 0.99713 | 0.001699 | 3732 | 27 |
| SavV.91 | SSaD170 | SSaD85 | 1       | 0        | 712  | 28 |

(Fisher's method)

| Locus                                                                                                        | pair                                                                                  | Chi2                                                                                                     | df                                                 | P-Value                                                                                                                                  |              |  |
|--------------------------------------------------------------------------------------------------------------|---------------------------------------------------------------------------------------|----------------------------------------------------------------------------------------------------------|----------------------------------------------------|------------------------------------------------------------------------------------------------------------------------------------------|--------------|--|
| SSa197 &<br>SSa197 &                                                                                         | SSaD170<br>SSaD190                                                                    | Infinity<br>44.890304                                                                                    | 20<br>20                                           | Highly sign.<br>0.001142                                                                                                                 |              |  |
| SSaD170 &<br>SSa197 &<br>SSaD170 &<br>SSaD190 &<br>SSa197 &                                                  | SSaD190<br>SSaD71<br>SSaD71<br>SSaD71<br>SSaD85                                       | Infinity<br>Infinity<br>Infinity<br>Infinity<br>40.908989                                                | 20<br>20<br>20<br>20<br>20                         | Highly sign.<br>Highly sign.<br>Highly sign.<br>Highly sign.<br>0.003827                                                                 |              |  |
| SSaD170 &<br>SSaD190 &<br>SSaD71 &<br>SSa197 &<br>SSaD170 &<br>SSaD190 &<br>SSaD71 &<br>SSaD85 &<br>SSa197 & | SSaD85<br>SSaD85<br>SSaD85<br>Brun13<br>Brun13<br>Brun13<br>Brun13<br>Brun13<br>SSa85 | Infinity<br>Infinity<br>Infinity<br>Infinity<br>Infinity<br>Infinity<br>Infinity<br>Infinity<br>37.63899 | 20<br>20<br>20<br>20<br>20<br>20<br>20<br>20<br>20 | Highly sign.<br>Highly sign.<br>Highly sign.<br>Highly sign.<br>Highly sign.<br>Highly sign.<br>Highly sign.<br>Highly sign.<br>0.009799 |              |  |
| SSaD170 &<br>SSaD190 &                                                                                       | SSa85<br>SSa85                                                                        | Infinity<br>22.707642                                                                                    | 20<br>20                                           | Highly sign.<br>0.303377                                                                                                                 |              |  |
| SSaD71 &                                                                                                     | SSa85                                                                                 | 44.23069                                                                                                 | 20                                                 | 0.001401                                                                                                                                 |              |  |
| SSaD85 &<br>Brun13 &                                                                                         | SSa85<br>SSa85                                                                        | 42.568418<br>37.17681                                                                                    | 20<br>20                                           | 0.00233<br>0.011144                                                                                                                      |              |  |
| SSa197 &                                                                                                     | STR73INRA                                                                             |                                                                                                          | 21.484011                                          | 20                                                                                                                                       | 0.369153     |  |
| SSaD170 &                                                                                                    | STR73INRA                                                                             |                                                                                                          | Infinity                                           | 20                                                                                                                                       | Highly sign. |  |
| SSaD190 &                                                                                                    | STR73INRA                                                                             |                                                                                                          | 40.30685                                           | 20                                                                                                                                       | 0.004568     |  |
| SSaD71 &                                                                                                     | STR73INRA                                                                             |                                                                                                          | Infinity                                           | 20                                                                                                                                       | Highly sign. |  |
| SSaD85 &                                                                                                     | STR73INRA                                                                             |                                                                                                          | 22.954689                                          | 20                                                                                                                                       | 0.291025     |  |
| Brun13 &                                                                                                     | STR73INRA                                                                             |                                                                                                          | 30.711729                                          | 20                                                                                                                                       | 0.059113     |  |
| SSa85 &                                                                                                      | STR73INRA                                                                             |                                                                                                          | 55.897665                                          | 20                                                                                                                                       | 0.00003      |  |
