# Supplementary material for: Genetic Diversity of Hatchery-Bred Brown Trout (Salmo trutta) Compared with the Wild Population: Potential Effects of Stocking on the Indigenous Gene Pool of a Norwegian Reservoir
Source: MDPI journal article supplement (doi:10.3390/d13090414), 2021-08-29
Supplement: s1 [file s1 › Table S3.pdf]

**Table S3.** Sex distribution and number of the parents of the 2005 to 2011 hatchery cohorts, and year-class distributing of the stocked fish that were recaptured in 2010.

|                               |         | <b>Hatchery fish cohort</b> |             |             |             |             |             |             |
|-------------------------------|---------|-----------------------------|-------------|-------------|-------------|-------------|-------------|-------------|
| <b>Year-class</b>             |         | <b>2005</b>                 | <b>2006</b> | <b>2007</b> | <b>2008</b> | <b>2009</b> | <b>2010</b> | <b>2011</b> |
| Number of parents             | Females | 10                          | 4           | 8           | 6           | 6           | 12          | 11          |
|                               | Males   | 9                           | 5           | 14          | 17          | 7           | 9           | 13          |
|                               | Totally | 19                          | 9           | 22          | 23          | 13          | 21          | 24          |
| Stocked fish, recaptured 2010 |         | 3                           | 2           | 11          | 14          | 5           |             |             |
