# Supplementary material for: Genetic Diversity of Hatchery-Bred Brown Trout (Salmo trutta) Compared with the Wild Population: Potential Effects of Stocking on the Indigenous Gene Pool of a Norwegian Reservoir
Source: MDPI journal article supplement (doi:10.3390/d13090414), 2021-08-29
Supplement: s1 [file s1 › Table S4.pdf]

Table S4. Results from AMOVA by means of Arlequin software, with nine different groupings of three to five groups A, B, C, D, E), with fixation indices: Differentiation between groups ( $F_{CT}$ ), differentiation between populations within groups ( $F_{SC}$ ), differentiation between individuals and between groups ( $F_{IT}$ ), and differentiation between individuals within population ( $F_{IS}$ ).

| Samples  |           |          |          |          |          |          |          |          |          |          | Indices of differentiation |          |          |          |
|----------|-----------|----------|----------|----------|----------|----------|----------|----------|----------|----------|----------------------------|----------|----------|----------|
| Grouping | Recapt.10 | Hatch.09 | Hatch.10 | Hatch.11 | SavW.91  | SavW.10  | Mog.08   | Sag.08   | Sag.11   | Sag.12   | $F_{CT}$                   | $F_{SC}$ | $F_{IT}$ | $F_{IS}$ |
| 1        | A         | A        | A        | A        | B        | B        | C        | C        | C        | C        | 0.0043                     | 0.0315*  | 0.0239*  | -0.0122  |
| 2        | A         | A        | A        | A        | B        | B        | C        | C        | D        | D        | 0.0073                     | 0.0286*  | 0.0240*  | -0.0122  |
| 3        | <b>A</b>  | <b>A</b> | <b>A</b> | <b>A</b> | <b>B</b> | <b>B</b> | <b>B</b> | <b>B</b> | <b>C</b> | <b>C</b> | <b>0.0122*</b>             | 0.0256*  | 0.0258*  | -0.0122  |
| 4        | A         | A        | A        | A        | B        | C        | C        | C        | D        | D        | 0.0098                     | 0.0269*  | 0.0247*  | -0.0122  |
| 5        | A         | B        | B        | B        | C        | C        | D        | C        | E        | E        | 0.0115                     | 0.0249   | 0.0243   | -0.0122  |
| 6        | A         | B        | B        | B        | A        | A        | C        | C        | C        | C        | 0.0035                     | 0.0319*  | 0.0236*  | -0.0122  |
| 7        | A         | B        | B        | B        | A        | A        | C        | D        | D        | D        | 0.0032                     | 0.0319*  | 0.0233*  | -0.0122  |
| 8        | <b>A</b>  | <b>B</b> | <b>B</b> | <b>B</b> | <b>C</b> | <b>C</b> | <b>C</b> | <b>C</b> | <b>D</b> | <b>D</b> | <b>0.0136*</b>             | 0.0238*  | 0.0254*  | -0.0122  |
| 9        | A         | B        | B        | B        | A        | A        | C        | C        | D        | D        | 0.0064                     | 0.0292*  | 0.0237*  | -0.0122  |

\*= significantly ( $p < 0.05$ ) different from null with 1023 permutatuons
