# Supplementary material for: Genetic Diversity of Hatchery-Bred Brown Trout (Salmo trutta) Compared with the Wild Population: Potential Effects of Stocking on the Indigenous Gene Pool of a Norwegian Reservoir
Source: MDPI journal article supplement (doi:10.3390/d13090414), 2021-08-29
Supplement: s1 [file s1 › Table.S1.pdf]

Title line:"Saval.10.pop"

SSa197

SSaD170

SSaD190

SSaD71

SSaD85

Brun13

SSa85

STR73I

POP

|           |        |        |        |        |        |        |        |        |
|-----------|--------|--------|--------|--------|--------|--------|--------|--------|
| SavR.10,  | 134134 | 176184 | 136136 | 194194 | 202202 | 181205 | 114118 | 139139 |
| SavR.10,  | 154154 | 152176 | 116136 | 194194 | 202202 | 193205 | 114114 | 143145 |
| SavR.10,  | 134154 | 152176 | 116116 | 190238 | 198202 | 179181 | 114118 | 139145 |
| SavR.10,  | 150154 | 152164 | 136144 | 190230 | 170202 | 193193 | 114118 | 143145 |
| SavR.10,  | 134154 | 136152 | 136136 | 230234 | 170170 | 193205 | 116120 | 139143 |
| SavR.10,  | 142142 | 136152 | 116144 | 190230 | 170194 | 193205 | 116118 | 139143 |
| SavR.10,  | 142154 | 176176 | 116116 | 190198 | 202202 | 193205 | 114118 | 143145 |
| SavR.10,  | 154154 | 152176 | 116116 | 194194 | 202202 | 235235 | 114114 | 143145 |
| SavR.10,  | 134154 | 152184 | 116136 | 190194 | 194202 | 179235 | 114114 | 139143 |
| SavR.10,  | 154154 | 152184 | 116116 | 194194 | 198202 | 205235 | 114114 | 145145 |
| SavR.10,  | 142150 | 136176 | 116140 | 190190 | 190202 | 193205 | 114118 | 143143 |
| SavR.10,  | 134134 | 152164 | 144144 | 194230 | 194202 | 181193 | 114118 | 143145 |
| SavR.10,  | 134134 | 136152 | 116136 | 194194 | 202202 | 181193 | 114118 | 139139 |
| SavR.10,  | 134154 | 152160 | 144144 | 194230 | 170194 | 181193 | 114118 | 143145 |
| SavR.10,  | 150154 | 152160 | 144144 | 194230 | 170202 | 179181 | 114118 | 143145 |
| SavR.10,  | 150154 | 152164 | 136144 | 190230 | 170202 | 193193 | 114118 | 143145 |
| SavR.10,  | 134154 | 152164 | 144144 | 194230 | 170194 | 179181 | 114118 | 143145 |
| SavR.10,  | 134154 | 152176 | 116116 | 186194 | 198202 | 193205 | 114118 | 143145 |
| SavR.10,  | 154154 | 152176 | 116144 | 194194 | 198202 | 193235 | 114118 | 145145 |
| SavR.10,  | 134154 | 176184 | 116116 | 190198 | 170202 | 169181 | 114118 | 143143 |
| SavR.10,  | 134154 | 152160 | 136140 | 194230 | 170194 | 179193 | 114118 | 143145 |
| SavR.10,  | 134154 | 176184 | 116116 | 194194 | 170202 | 181193 | 114118 | 139145 |
| SavR.10,  | 150154 | 152160 | 144144 | 194230 | 194202 | 181193 | 114118 | 143145 |
| SavR.10,  | 134134 | 152160 | 144144 | 194230 | 170194 | 181193 | 114118 | 143145 |
| SavR.10,  | 134150 | 152160 | 144144 | 190230 | 170170 | 181193 | 114118 | 143145 |
| SavR.10,  | 134154 | 152164 | 140144 | 194230 | 194202 | 179193 | 114118 | 143145 |
| SavR.10,  | 134134 | 152160 | 136144 | 194230 | 170194 | 179181 | 114118 | 143145 |
| SavR.10,  | 134150 | 148164 | 116116 | 198238 | 194198 | 193205 | 114118 | 139145 |
| SavR.10,  | 134150 | 152160 | 144144 | 190230 | 170170 | 181193 | 114118 | 143145 |
| SavR.10,  | 142154 | 152192 | 116116 | 194198 | 170170 | 205205 | 116118 | 139145 |
| SavR.10,  | 154154 | 176176 | 116116 | 190194 | 202202 | 205235 | 114118 | 143145 |
| SavR.10,  | 150154 | 152160 | 136144 | 194230 | 194202 | 181193 | 114118 | 143145 |
| SavR.10,  | 154154 | 176192 | 116116 | 198234 | 170202 | 181193 | 118118 | 139143 |
| SavR.10,  | 134154 | 160176 | 136144 | 190194 | 170202 | 193235 | 118118 | 139143 |
| SavR.10,  | 138150 | 192192 | 136136 | 190194 | 198202 | 169193 | 116120 | 139143 |
| POP       |        |        |        |        |        |        |        |        |
| Hatch.09, | 134154 | 136184 | 116136 | 194198 | 198202 | 179233 | 114118 | 143145 |
| Hatch.09, | 142154 | 184184 | 116136 | 194222 | 198202 | 193203 | 114114 | 145145 |
| Hatch.09, | 142142 | 000000 | 116136 | 190194 | 194202 | 179203 | 114116 | 143145 |
| Hatch.09, | 134154 | 152156 | 116136 | 190190 | 194194 | 179193 | 114114 | 139145 |
| Hatch.09, | 142154 | 176184 | 116116 | 198222 | 202202 | 193233 | 114114 | 145145 |
| Hatch.09, | 142154 | 176184 | 116136 | 190194 | 202202 | 169193 | 114118 | 143145 |
| Hatch.09, | 142154 | 176176 | 116116 | 190198 | 202202 | 193203 | 114118 | 143145 |

|           |        |        |        |        |        |        |        |        |
|-----------|--------|--------|--------|--------|--------|--------|--------|--------|
| Hatch.09, | 150154 | 156176 | 116116 | 194198 | 202202 | 193193 | 114118 | 143145 |
| Hatch.09, | 154154 | 176184 | 116136 | 198222 | 198202 | 203233 | 114114 | 145145 |
| Hatch.09, | 154154 | 184184 | 116136 | 194198 | 202202 | 203233 | 114114 | 143145 |
| Hatch.09, | 142154 | 152152 | 116136 | 194194 | 194198 | 179203 | 116118 | 145145 |
| Hatch.09, | 150154 | 136184 | 116144 | 194194 | 198202 | 181233 | 114118 | 145145 |
| Hatch.09, | 134142 | 152184 | 136136 | 222234 | 194202 | 179233 | 116118 | 143145 |
| Hatch.09, | 154154 | 176184 | 116136 | 190194 | 202202 | 169233 | 114118 | 143145 |
| Hatch.09, | 142142 | 152176 | 136136 | 194198 | 198202 | 193203 | 114118 | 143145 |
| Hatch.09, | 134154 | 136184 | 116136 | 194194 | 198202 | 179193 | 114116 | 143145 |
| Hatch.09, | 142142 | 184184 | 116116 | 190194 | 194198 | 179203 | 114118 | 139145 |
| Hatch.09, | 150154 | 148176 | 116144 | 190190 | 170202 | 169193 | 116118 | 143143 |
| Hatch.09, | 150154 | 156184 | 136144 | 194198 | 194202 | 191193 | 114118 | 143145 |
| Hatch.09, | 134150 | 156184 | 136144 | 198198 | 194198 | 179191 | 000000 | 139143 |
| Hatch.09, | 134142 | 184184 | 116116 | 194194 | 194198 | 179233 | 000000 | 139143 |
| Hatch.09, | 150154 | 136184 | 116144 | 194194 | 198202 | 191233 | 114118 | 143145 |
| Hatch.09, | 154154 | 184184 | 116116 | 194194 | 202202 | 193203 | 114118 | 145145 |
| Hatch.09, | 150154 | 176176 | 116140 | 190190 | 170202 | 181203 | 116118 | 143143 |
| Hatch.09, | 142142 | 152176 | 116136 | 194198 | 202202 | 203233 | 114118 | 145145 |
| Hatch.09, | 142154 | 152184 | 116136 | 198222 | 202202 | 233235 | 114114 | 143145 |
| Hatch.09, | 134134 | 156176 | 116116 | 190194 | 170202 | 193193 | 116118 | 139143 |
| Hatch.09, | 142142 | 152184 | 116136 | 190190 | 194198 | 179233 | 114116 | 143145 |
| Hatch.09, | 134134 | 136188 | 124124 | 190194 | 170182 | 181193 | 114118 | 139145 |
| Hatch.09, | 000000 | 176184 | 136140 | 194194 | 170202 | 193233 | 114116 | 143145 |
| POP       |        |        |        |        |        |        |        |        |
| Hatch.10, | 134150 | 148152 | 116144 | 194194 | 170194 | 179193 | 114118 | 143145 |
| Hatch.10, | 134150 | 136156 | 116140 | 194194 | 170178 | 179193 | 116118 | 139145 |
| Hatch.10, | 154164 | 136172 | 116136 | 198198 | 170194 | 193193 | 114114 | 143145 |
| Hatch.10, | 134154 | 136148 | 116144 | 194194 | 194202 | 193193 | 118118 | 139143 |
| Hatch.10, | 134142 | 152152 | 116144 | 194194 | 170198 | 193205 | 114118 | 139145 |
| Hatch.10, | 134134 | 136136 | 116116 | 194194 | 170170 | 193193 | 118118 | 143143 |
| Hatch.10, | 134134 | 136160 | 132144 | 190190 | 170202 | 201205 | 114118 | 143145 |
| Hatch.10, | 142154 | 152188 | 128144 | 194194 | 170170 | 193205 | 114118 | 139145 |
| Hatch.10, | 134134 | 148152 | 116144 | 194194 | 170194 | 193205 | 114114 | 143145 |
| Hatch.10, | 150150 | 136156 | 116116 | 186194 | 166166 | 191193 | 114120 | 139145 |
| Hatch.10, | 134154 | 136152 | 116128 | 190194 | 170170 | 181193 | 116118 | 143143 |
| Hatch.10, | 134142 | 152152 | 116144 | 194194 | 198198 | 193205 | 114118 | 143145 |
| Hatch.10, | 142154 | 152152 | 128144 | 190194 | 170198 | 193193 | 114118 | 143145 |
| Hatch.10, | 142154 | 152152 | 144144 | 190194 | 198198 | 179205 | 114118 | 139145 |
| Hatch.10, | 142154 | 152188 | 132144 | 194194 | 170198 | 179193 | 114118 | 139145 |
| Hatch.10, | 134134 | 156160 | 116116 | 194230 | 202202 | 193201 | 118118 | 143145 |
| Hatch.10, | 142154 | 152180 | 116128 | 190194 | 170170 | 193201 | 114118 | 143145 |
| Hatch.10, | 134150 | 180184 | 116140 | 194194 | 170202 | 191193 | 114118 | 139145 |
| Hatch.10, | 134134 | 136136 | 116116 | 190190 | 170170 | 193201 | 114118 | 145145 |
| Hatch.10, | 134134 | 156192 | 116136 | 190194 | 170202 | 193193 | 114118 | 143143 |
| Hatch.10, | 134134 | 136176 | 116144 | 194194 | 194202 | 181193 | 116118 | 143143 |
| Hatch.10, | 142154 | 152152 | 116128 | 190194 | 198198 | 179205 | 114118 | 143145 |
| Hatch.10, | 134134 | 136160 | 116116 | 194194 | 166170 | 201205 | 116118 | 145145 |
| Hatch.10, | 134150 | 160176 | 116132 | 202202 | 170198 | 193193 | 118118 | 143145 |
| Hatch.10, | 142154 | 136152 | 116128 | 194194 | 170186 | 193201 | 114118 | 143143 |
| Hatch.10, | 150164 | 152176 | 116136 | 194194 | 170194 | 179193 | 114114 | 143145 |
| Hatch.10, | 142154 | 152188 | 116128 | 190194 | 170198 | 193205 | 114118 | 139145 |
| Hatch.10, | 134150 | 136160 | 116136 | 190190 | 170202 | 193193 | 114118 | 143143 |
| Hatch.10, | 150150 | 152160 | 116116 | 202202 | 170198 | 183193 | 116118 | 139143 |
| Hatch.10, | 134150 | 136176 | 116136 | 194194 | 170194 | 179179 | 114118 | 143145 |

|           |        |        |        |        |        |        |        |        |
|-----------|--------|--------|--------|--------|--------|--------|--------|--------|
| Hatch.10, | 134150 | 136160 | 116144 | 190190 | 166202 | 193193 | 116118 | 143143 |
| Hatch.10, | 142142 | 152176 | 116116 | 190190 | 170170 | 181183 | 114116 | 143145 |
| Hatch.10, | 150164 | 148152 | 116136 | 194194 | 170198 | 193193 | 114118 | 143145 |
| Hatch.10, | 142154 | 136152 | 116116 | 194194 | 170198 | 193201 | 116118 | 145145 |
| Hatch.10, | 134134 | 136176 | 116144 | 190194 | 170202 | 181193 | 116118 | 139143 |
| POP       |        |        |        |        |        |        |        |        |
| Hatch.11, | 154154 | 136152 | 136144 | 198198 | 174182 | 193205 | 118118 | 143145 |
| Hatch.11, | 150154 | 136180 | 116136 | 194198 | 170198 | 179205 | 114118 | 139145 |
| Hatch.11, | 150154 | 136152 | 136144 | 190194 | 194198 | 193205 | 116118 | 139145 |
| Hatch.11, | 134142 | 152160 | 116144 | 186190 | 198202 | 193201 | 114118 | 139143 |
| Hatch.11, | 154154 | 148152 | 116144 | 198238 | 182194 | 193205 | 114118 | 143145 |
| Hatch.11, | 154154 | 136184 | 116136 | 190190 | 202202 | 193205 | 116118 | 139145 |
| Hatch.11, | 134150 | 184184 | 116140 | 198202 | 202202 | 179193 | 114118 | 139143 |
| Hatch.11, | 134142 | 152184 | 116116 | 190190 | 194202 | 179183 | 116118 | 143145 |
| Hatch.11, | 154154 | 184184 | 116116 | 190222 | 198202 | 193193 | 114118 | 139145 |
| Hatch.11, | 134134 | 152160 | 116136 | 190194 | 190202 | 193205 | 116118 | 143145 |
| Hatch.11, | 154154 | 136152 | 116116 | 190190 | 198202 | 193205 | 114114 | 139145 |
| Hatch.11, | 134134 | 136176 | 116116 | 194198 | 198202 | 181205 | 114116 | 139143 |
| Hatch.11, | 134150 | 136176 | 116136 | 190210 | 170198 | 183193 | 114114 | 139145 |
| Hatch.11, | 134154 | 136180 | 116136 | 190210 | 198198 | 179205 | 114116 | 143145 |
| Hatch.11, | 134134 | 152184 | 128144 | 198202 | 170202 | 193193 | 114118 | 139145 |
| Hatch.11, | 134150 | 160184 | 116144 | 190194 | 170170 | 193193 | 116118 | 139143 |
| Hatch.11, | 142150 | 156184 | 128136 | 190198 | 194198 | 179181 | 116118 | 143145 |
| Hatch.11, | 134154 | 136136 | 116124 | 190198 | 170170 | 179183 | 114114 | 139145 |
| Hatch.11, | 134134 | 136176 | 136136 | 190198 | 170170 | 179183 | 114116 | 139145 |
| Hatch.11, | 150154 | 152152 | 116140 | 186194 | 198202 | 193205 | 114116 | 143145 |
| Hatch.11, | 134134 | 184184 | 116116 | 194198 | 170198 | 179205 | 114116 | 139143 |
| Hatch.11, | 134134 | 184184 | 116116 | 194198 | 170170 | 179205 | 114116 | 139143 |
| Hatch.11, | 134134 | 136184 | 116136 | 194194 | 198202 | 179205 | 114116 | 139143 |
| Hatch.11, | 154154 | 152176 | 116136 | 190198 | 170170 | 183193 | 116118 | 143145 |
| Hatch.11, | 134142 | 152160 | 116144 | 190194 | 198202 | 193205 | 116118 | 139143 |
| Hatch.11, | 134142 | 152184 | 116136 | 234234 | 194202 | 179183 | 114116 | 143145 |
| Hatch.11, | 134154 | 136152 | 116124 | 198234 | 170202 | 179193 | 114116 | 143145 |
| Hatch.11, | 134134 | 136176 | 116136 | 194194 | 198202 | 179205 | 114118 | 139139 |
| Hatch.11, | 150154 | 152176 | 116136 | 198234 | 170170 | 183193 | 114116 | 145145 |
| Hatch.11, | 142150 | 136136 | 116144 | 190190 | 202202 | 193205 | 114116 | 143145 |
| Hatch.11, | 134134 | 136184 | 116136 | 194198 | 198202 | 179205 | 114116 | 139143 |
| Hatch.11, | 134134 | 136176 | 116136 | 190198 | 170170 | 181183 | 114116 | 143145 |
| Hatch.11, | 142150 | 156184 | 136144 | 190198 | 194194 | 179181 | 116118 | 143145 |
| Hatch.11, | 134154 | 136136 | 116136 | 190210 | 170198 | 183193 | 114118 | 143145 |
| Hatch.11, | 154154 | 136160 | 140144 | 194210 | 166170 | 193205 | 118118 | 143143 |
| Hatch.11, | 142154 | 136184 | 116116 | 190222 | 194202 | 193193 | 114118 | 143145 |
| Hatch.11, | 134134 | 164184 | 116116 | 190234 | 194198 | 179201 | 114114 | 143145 |
| Hatch.11, | 134134 | 176184 | 116136 | 194198 | 198202 | 179205 | 114116 | 139139 |
| Hatch.11, | 142154 | 136152 | 116144 | 190194 | 194202 | 193193 | 114114 | 139143 |
| Hatch.11, | 154154 | 136152 | 116144 | 198198 | 174182 | 193205 | 116118 | 143145 |
| Hatch.11, | 134142 | 152184 | 136136 | 234234 | 194202 | 179179 | 116118 | 139145 |
| Hatch.11, | 134142 | 136184 | 116116 | 194194 | 198202 | 179235 | 114116 | 139139 |
| Hatch.11, | 134134 | 184184 | 116124 | 194194 | 170198 | 179205 | 114118 | 139143 |
| Hatch.11, | 134134 | 160180 | 116136 | 190194 | 198198 | 193201 | 116116 | 143145 |
| Hatch.11, | 134134 | 164184 | 116136 | 190190 | 194198 | 179201 | 114114 | 143145 |
| Hatch.11, | 134142 | 152164 | 136136 | 190234 | 194198 | 179201 | 114114 | 139143 |
| Hatch.11, | 134134 | 152184 | 128136 | 198198 | 194202 | 179179 | 114116 | 143145 |
| Hatch.11, | 134142 | 152152 | 116136 | 234234 | 194202 | 179183 | 116118 | 139145 |

|           |        |        |        |        |        |        |        |        |
|-----------|--------|--------|--------|--------|--------|--------|--------|--------|
| Hatch.11, | 134142 | 152160 | 116144 | 186190 | 198198 | 179205 | 116116 | 143145 |
| Hatch.11, | 134134 | 164184 | 116136 | 230234 | 194198 | 179201 | 114114 | 139145 |
| POP       |        |        |        |        |        |        |        |        |
| SavW.91,  | 142150 | 148152 | 116144 | 186198 | 170202 | 179205 | 114118 | 143143 |
| SavW.91,  | 134134 | 136184 | 116140 | 194194 | 170198 | 201203 | 108118 | 139143 |
| SavW.91,  | 150150 | 148200 | 128144 | 190190 | 198198 | 193201 | 114118 | 143143 |
| SavW.91,  | 154154 | 136152 | 116144 | 194194 | 182194 | 179193 | 116120 | 145145 |
| SavW.91,  | 134154 | 152192 | 116140 | 190190 | 198202 | 179203 | 118120 | 139143 |
| SavW.91,  | 134142 | 136152 | 140144 | 186190 | 178178 | 193193 | 116118 | 145145 |
| SavW.91,  | 142150 | 152152 | 116116 | 194194 | 170170 | 193203 | 114118 | 143145 |
| SavW.91,  | 142154 | 152152 | 116140 | 186190 | 166170 | 179193 | 118118 | 145145 |
| SavW.91,  | 134134 | 156184 | 144144 | 190190 | 194198 | 193193 | 108118 | 143143 |
| SavW.91,  | 134154 | 152152 | 136140 | 190202 | 170202 | 181193 | 116118 | 143145 |
| SavW.91,  | 138150 | 136148 | 140144 | 194198 | 170170 | 169193 | 118118 | 143143 |
| SavW.91,  | 150154 | 148180 | 128144 | 186190 | 198198 | 191193 | 114118 | 139145 |
| SavW.91,  | 130138 | 136136 | 116128 | 194198 | 198198 | 193201 | 114118 | 145145 |
| SavW.91,  | 150150 | 152156 | 128144 | 190234 | 198198 | 193205 | 118120 | 139143 |
| SavW.91,  | 142142 | 148152 | 132144 | 198198 | 178190 | 179181 | 114114 | 145145 |
| SavW.91,  | 154160 | 152184 | 128144 | 190190 | 166190 | 181193 | 114114 | 143143 |
| SavW.91,  | 134134 | 136152 | 128140 | 198230 | 190194 | 193193 | 118120 | 145145 |
| SavW.91,  | 142142 | 152176 | 116116 | 194194 | 170202 | 181203 | 118118 | 145145 |
| SavW.91,  | 134154 | 152152 | 116132 | 186190 | 178194 | 181181 | 114118 | 139145 |
| SavW.91,  | 150150 | 136160 | 116128 | 190190 | 194198 | 193199 | 114116 | 143143 |
| SavW.91,  | 134150 | 136160 | 128144 | 190198 | 170198 | 193203 | 114116 | 139145 |
| SavW.91,  | 134154 | 160196 | 116144 | 190194 | 166186 | 169181 | 114116 | 139139 |
| SavW.91,  | 138154 | 136136 | 116136 | 190190 | 170198 | 189201 | 114118 | 143145 |
| SavW.91,  | 134142 | 148156 | 132144 | 194210 | 166198 | 181195 | 114118 | 145145 |
| SavW.91,  | 134150 | 188192 | 136144 | 194194 | 166198 | 193205 | 108118 | 143143 |
| SavW.91,  | 134138 | 152192 | 116140 | 190198 | 170198 | 191199 | 120120 | 139145 |
| SavW.91,  | 138150 | 152192 | 128144 | 186198 | 170194 | 191193 | 116120 | 143145 |
| SavW.91,  | 134154 | 136136 | 116116 | 190198 | 190198 | 193193 | 114116 | 139145 |
| SavW.91,  | 154154 | 172184 | 128132 | 198230 | 194198 | 177181 | 118118 | 145145 |
| SavW.91,  | 134150 | 136152 | 140144 | 202234 | 198198 | 179179 | 114116 | 145145 |
| SavW.91,  | 142150 | 152176 | 124140 | 190230 | 170198 | 181193 | 114118 | 145145 |
| SavW.91,  | 134138 | 136180 | 136140 | 190194 | 194202 | 179205 | 118118 | 143145 |
| SavW.91,  | 134154 | 176184 | 128132 | 198230 | 198202 | 193193 | 118120 | 145145 |
| POP       |        |        |        |        |        |        |        |        |
| SavW.10,  | 150154 | 152180 | 116128 | 190198 | 170202 | 169181 | 108118 | 143145 |
| SavW.10,  | 142154 | 136192 | 116116 | 194230 | 198202 | 193201 | 116118 | 143143 |
| SavW.10,  | 142154 | 160160 | 128140 | 190190 | 170170 | 179183 | 118120 | 143145 |
| SavW.10,  | 150164 | 164200 | 116124 | 198198 | 178198 | 169179 | 114118 | 145145 |
| SavW.10,  | 134160 | 152184 | 124128 | 190198 | 198202 | 181193 | 116118 | 143143 |
| SavW.10,  | 134134 | 156176 | 116116 | 194194 | 170194 | 179235 | 114116 | 143143 |
| SavW.10,  | 134154 | 136152 | 116116 | 194198 | 198202 | 181183 | 114114 | 143145 |
| SavW.10,  | 154154 | 152176 | 116128 | 194194 | 198202 | 179235 | 114118 | 143145 |
| SavW.10,  | 138142 | 136152 | 128136 | 186190 | 170170 | 193193 | 114116 | 139143 |
| SavW.10,  | 142150 | 136152 | 128136 | 198234 | 170198 | 193193 | 114116 | 139139 |
| SavW.10,  | 150154 | 136176 | 116124 | 194238 | 198202 | 193235 | 116118 | 139145 |
| SavW.10,  | 134154 | 152176 | 136136 | 194198 | 198202 | 181235 | 114114 | 145145 |
| SavW.10,  | 138138 | 164192 | 124140 | 194218 | 202202 | 179205 | 116118 | 143145 |
| SavW.10,  | 134142 | 136152 | 136136 | 194230 | 190198 | 181193 | 114118 | 145145 |
| SavW.10,  | 134150 | 152192 | 116132 | 190190 | 166186 | 193193 | 116118 | 139143 |
| SavW.10,  | 134154 | 136136 | 128140 | 194238 | 194194 | 201205 | 114118 | 139145 |
| SavW.10,  | 134154 | 176176 | 116136 | 194194 | 170198 | 179179 | 116116 | 143145 |

|                |        |        |        |        |        |        |        |        |
|----------------|--------|--------|--------|--------|--------|--------|--------|--------|
| SavW.10,       | 150154 | 136152 | 128136 | 186194 | 170170 | 201205 | 114120 | 139143 |
| SavW.10,       | 134154 | 152176 | 116124 | 190194 | 170170 | 193201 | 114116 | 139145 |
| SavW.10,       | 134150 | 136152 | 116144 | 194198 | 190202 | 181207 | 118118 | 139145 |
| SavW.10,       | 134150 | 136164 | 116144 | 194242 | 178202 | 179181 | 108114 | 139145 |
| SavW.10,       | 142142 | 152184 | 116116 | 198222 | 198198 | 205205 | 114116 | 139143 |
| SavW.10,       | 134150 | 136152 | 144144 | 194198 | 170194 | 179193 | 114118 | 139143 |
| SavW.10,       | 134150 | 152152 | 144144 | 194230 | 170194 | 193207 | 114118 | 143145 |
| SavW.10,       | 154154 | 136152 | 116116 | 194194 | 170186 | 193201 | 118118 | 143145 |
| SavW.10,       | 134154 | 152152 | 116136 | 194198 | 170170 | 193205 | 116120 | 139143 |
| SavW.10,       | 134154 | 136148 | 116116 | 190198 | 198202 | 179193 | 114114 | 139143 |
| SavW.10,       | 134160 | 148176 | 132144 | 190194 | 170198 | 179193 | 116116 | 143145 |
| SavW.10,       | 134134 | 152176 | 124124 | 190194 | 202202 | 179235 | 118118 | 145145 |
| SavW.10,       | 150150 | 152188 | 116140 | 190198 | 166190 | 179183 | 114118 | 145145 |
| SavW.10,       | 142150 | 152152 | 116116 | 190194 | 170174 | 179179 | 114118 | 143143 |
| SavW.10,       | 154160 | 184184 | 116148 | 190230 | 170198 | 181201 | 118118 | 145145 |
| SavW.10,       | 134154 | 136152 | 136140 | 198230 | 190194 | 179181 | 114114 | 145145 |
| SavW.10,       | 134150 | 136152 | 116136 | 198234 | 170198 | 179181 | 114118 | 143145 |
| POP            |        |        |        |        |        |        |        |        |
| Mog.08, 134134 | 152156 | 140144 | 198234 | 170198 | 169191 | 114118 | 139145 |        |
| Mog.08, 134154 | 152160 | 116128 | 194198 | 202202 | 179183 | 116116 | 143145 |        |
| Mog.08, 134154 | 152192 | 116116 | 194194 | 170198 | 169201 | 114118 | 139143 |        |
| Mog.08, 134154 | 136184 | 116136 | 190194 | 170170 | 179193 | 118118 | 139143 |        |
| Mog.08, 134154 | 152152 | 140144 | 194238 | 170170 | 179201 | 114116 | 139143 |        |
| Mog.08, 142154 | 152184 | 128136 | 190230 | 166170 | 203203 | 116118 | 143145 |        |
| Mog.08, 134134 | 152180 | 116116 | 194194 | 170170 | 179179 | 116118 | 143145 |        |
| Mog.08, 142150 | 176184 | 116132 | 190190 | 194198 | 173203 | 116118 | 145145 |        |
| Mog.08, 142142 | 152184 | 116128 | 198198 | 198198 | 173203 | 114118 | 145145 |        |
| Mog.08, 138142 | 148168 | 136140 | 186238 | 166198 | 179193 | 114118 | 139143 |        |
| Mog.08, 142154 | 152180 | 128136 | 194198 | 198202 | 179203 | 116118 | 143145 |        |
| Mog.08, 134154 | 152152 | 136136 | 194230 | 198202 | 169179 | 114116 | 139143 |        |
| Mog.08, 154154 | 152180 | 116116 | 186190 | 166198 | 173181 | 118118 | 145145 |        |
| Mog.08, 134134 | 136136 | 136136 | 194194 | 170202 | 169203 | 116118 | 143145 |        |
| Mog.08, 142154 | 152152 | 116136 | 194234 | 170170 | 169179 | 114116 | 139143 |        |
| Mog.08, 134134 | 176184 | 116144 | 190198 | 170194 | 181193 | 116118 | 139145 |        |
| Mog.08, 142150 | 136148 | 116116 | 186190 | 170198 | 179181 | 114114 | 143143 |        |
| Mog.08, 134154 | 152184 | 136136 | 198230 | 170170 | 179179 | 116118 | 143143 |        |
| Mog.08, 134150 | 136148 | 128140 | 190194 | 170202 | 181201 | 114116 | 143143 |        |
| Mog.08, 134154 | 156180 | 116116 | 190198 | 194198 | 181193 | 118118 | 145145 |        |
| Mog.08, 134134 | 152184 | 116136 | 198230 | 170170 | 193203 | 116118 | 143145 |        |
| Mog.08, 134134 | 136176 | 128144 | 190194 | 194202 | 193193 | 114116 | 139143 |        |
| Mog.08, 134134 | 152180 | 136136 | 194198 | 170198 | 179193 | 114116 | 143145 |        |
| Mog.08, 150154 | 136160 | 144144 | 190230 | 198202 | 179179 | 114114 | 145145 |        |
| Mog.08, 134134 | 176180 | 124136 | 230234 | 202202 | 179179 | 114118 | 145145 |        |
| Mog.08, 134150 | 136136 | 116116 | 190194 | 194198 | 201203 | 116116 | 139145 |        |
| Mog.08, 138138 | 136152 | 116136 | 186186 | 194202 | 193203 | 114114 | 139139 |        |
| Mog.08, 150154 | 136176 | 116140 | 194238 | 170202 | 179193 | 116118 | 143145 |        |
| Mog.08, 134154 | 152176 | 116144 | 194194 | 170194 | 169181 | 114116 | 143143 |        |
| Mog.08, 134150 | 176184 | 116136 | 198230 | 170198 | 193193 | 114118 | 145145 |        |
| Mog.08, 150154 | 148152 | 116140 | 194238 | 170170 | 169193 | 116118 | 139143 |        |
| Mog.08, 134154 | 136148 | 116116 | 194194 | 170170 | 169193 | 116118 | 139139 |        |
| Mog.08, 142142 | 136136 | 116116 | 190210 | 170170 | 179203 | 116118 | 143145 |        |
| Mog.08, 138154 | 152192 | 116128 | 194194 | 174198 | 179181 | 114120 | 143143 |        |
| Mog.08, 150154 | 148148 | 116144 | 194194 | 170170 | 169181 | 114116 | 139143 |        |
| Mog.08, 142142 | 152184 | 116136 | 190194 | 170170 | 179205 | 116118 | 139143 |        |

|         |        |        |        |        |        |        |        |        |
|---------|--------|--------|--------|--------|--------|--------|--------|--------|
| Mog.08, | 154154 | 152180 | 116116 | 186198 | 170198 | 169203 | 114118 | 143145 |
| POP     |        |        |        |        |        |        |        |        |
| Sag.08, | 142154 | 152156 | 116136 | 194194 | 170170 | 193203 | 118118 | 139143 |
| Sag.08, | 142150 | 160184 | 136136 | 190198 | 170186 | 179181 | 114118 | 143143 |
| Sag.08, | 134150 | 148160 | 116128 | 190230 | 170198 | 179193 | 118118 | 139145 |
| Sag.08, | 134134 | 152152 | 144144 | 190190 | 170170 | 179193 | 114114 | 145145 |
| Sag.08, | 154154 | 152152 | 144144 | 198198 | 170202 | 179193 | 114114 | 145145 |
| Sag.08, | 138138 | 152180 | 116128 | 194238 | 170202 | 183189 | 118120 | 139145 |
| Sag.08, | 134150 | 136192 | 116136 | 194194 | 198202 | 193193 | 114118 | 143143 |
| Sag.08, | 134154 | 148152 | 140144 | 198238 | 190198 | 181193 | 118118 | 139143 |
| Sag.08, | 138154 | 152160 | 136144 | 190198 | 190198 | 179179 | 114118 | 143143 |
| Sag.08, | 154154 | 136152 | 116144 | 194198 | 194198 | 193233 | 108118 | 143145 |
| Sag.08, | 142150 | 152164 | 128136 | 198234 | 170198 | 189189 | 116116 | 139143 |
| Sag.08, | 150150 | 136152 | 116128 | 194194 | 198202 | 179181 | 108118 | 143145 |
| Sag.08, | 138150 | 136152 | 116128 | 194194 | 170198 | 189189 | 116120 | 139139 |
| Sag.08, | 154154 | 136152 | 116144 | 190198 | 170198 | 193233 | 108116 | 139143 |
| Sag.08, | 138150 | 152160 | 136144 | 186230 | 174194 | 179179 | 114116 | 143145 |
| Sag.08, | 150154 | 136192 | 116136 | 194194 | 198198 | 193203 | 118118 | 143145 |
| Sag.08, | 134150 | 136160 | 116144 | 190190 | 166174 | 179203 | 114114 | 143145 |
| Sag.08, | 134150 | 148160 | 144144 | 186194 | 194202 | 179181 | 114118 | 139145 |
| Sag.08, | 134154 | 136192 | 116116 | 194198 | 182202 | 181203 | 118118 | 143145 |
| Sag.08, | 134154 | 148152 | 132136 | 194198 | 170198 | 179203 | 114118 | 143143 |
| Sag.08, | 134134 | 136136 | 116132 | 194230 | 198202 | 193193 | 118118 | 139145 |
| Sag.08, | 138150 | 152192 | 116136 | 194194 | 170170 | 189193 | 108120 | 139143 |
| Sag.08, | 134150 | 136152 | 132140 | 190230 | 170170 | 179193 | 114114 | 145145 |
| Sag.08, | 130134 | 180184 | 136144 | 190194 | 170198 | 179233 | 108114 | 143145 |
| Sag.08, | 134154 | 152184 | 136144 | 190230 | 198198 | 183193 | 114118 | 143145 |
| Sag.08, | 154154 | 136184 | 132144 | 190230 | 170194 | 181193 | 114118 | 145145 |
| Sag.08, | 134150 | 152160 | 116128 | 190230 | 170198 | 179193 | 108116 | 145145 |
| Sag.08, | 134154 | 136160 | 116144 | 190194 | 170198 | 203203 | 114118 | 143143 |
| Sag.08, | 134134 | 136152 | 116116 | 194198 | 170202 | 193193 | 118120 | 143145 |
| Sag.08, | 134154 | 136188 | 116144 | 194230 | 170194 | 193193 | 114118 | 143145 |
| Sag.08, | 138160 | 136152 | 136140 | 194198 | 170174 | 189201 | 116120 | 139145 |
| Sag.08, | 134154 | 152152 | 132140 | 194198 | 166202 | 179193 | 114114 | 145145 |
| Sag.08, | 138150 | 136136 | 128140 | 190234 | 170170 | 193203 | 118120 | 139143 |
| Sag.08, | 130150 | 136136 | 116128 | 194198 | 170198 | 193233 | 108118 | 143143 |
| Sag.08, | 134150 | 136192 | 116132 | 190198 | 198202 | 181203 | 114114 | 143145 |
| Sag.08, | 134154 | 136160 | 116144 | 194198 | 170202 | 179203 | 114118 | 145145 |
| Sag.08, | 130150 | 136152 | 128136 | 190194 | 170198 | 193201 | 114118 | 143143 |
| Sag.08, | 130154 | 152184 | 116128 | 194198 | 194198 | 193201 | 114118 | 143143 |
| Sag.08, | 130154 | 136152 | 116128 | 194198 | 194198 | 193201 | 114116 | 139143 |
| Sag.08, | 154154 | 136136 | 128136 | 194198 | 194198 | 193201 | 114118 | 143145 |
| Sag.08, | 138154 | 136180 | 128128 | 198202 | 198198 | 179193 | 114118 | 143143 |
| Sag.08, | 142142 | 136160 | 116144 | 190190 | 166202 | 179193 | 114118 | 143145 |
| POP     |        |        |        |        |        |        |        |        |
| Sag.11, | 138142 | 160192 | 116136 | 194194 | 194202 | 179181 | 114116 | 145145 |
| Sag.11, | 150154 | 160184 | 128144 | 194194 | 170170 | 193193 | 114114 | 139143 |
| Sag.11, | 134134 | 156180 | 116140 | 190194 | 198202 | 000000 | 000000 | 143143 |
| Sag.11, | 134154 | 136152 | 116144 | 194198 | 170170 | 179205 | 114118 | 143143 |
| Sag.11, | 134154 | 148184 | 132140 | 190194 | 166170 | 181193 | 118120 | 143145 |
| Sag.11, | 134154 | 160160 | 116116 | 194198 | 170170 | 193205 | 114118 | 145145 |
| Sag.11, | 134134 | 136152 | 116136 | 198198 | 170170 | 179193 | 114118 | 143145 |
| Sag.11, | 134134 | 152184 | 116140 | 194198 | 170170 | 193193 | 118118 | 143145 |
| Sag.11, | 134134 | 136152 | 116116 | 198198 | 170170 | 179193 | 114118 | 143145 |

|         |        |        |        |        |        |        |        |        |
|---------|--------|--------|--------|--------|--------|--------|--------|--------|
| Sag.11, | 134134 | 136168 | 128136 | 186198 | 170170 | 205235 | 116118 | 139145 |
| Sag.11, | 134138 | 160180 | 116128 | 194202 | 170170 | 193205 | 114118 | 143143 |
| Sag.11, | 134134 | 136152 | 116116 | 194198 | 170170 | 193193 | 114114 | 143145 |
| Sag.11, | 134150 | 136152 | 116140 | 194194 | 170170 | 193193 | 118118 | 145145 |
| Sag.11, | 134134 | 152160 | 116144 | 194198 | 166170 | 193201 | 116118 | 145145 |
| Sag.11, | 134134 | 152160 | 116144 | 194198 | 170170 | 179193 | 116118 | 143145 |
| Sag.11, | 134134 | 136152 | 116132 | 190198 | 170170 | 179205 | 114118 | 139145 |
| Sag.11, | 134150 | 152160 | 136144 | 190198 | 194198 | 193193 | 114118 | 143143 |
| Sag.11, | 134150 | 136160 | 116144 | 194198 | 198202 | 179205 | 114114 | 143145 |
| Sag.11, | 134150 | 136160 | 140144 | 190198 | 170170 | 193193 | 114114 | 143145 |
| Sag.11, | 134154 | 136136 | 116144 | 194194 | 170170 | 193193 | 118118 | 139143 |
| Sag.11, | 134142 | 152160 | 144144 | 190198 | 170182 | 193205 | 116118 | 145145 |
| Sag.11, | 134150 | 152192 | 136144 | 190190 | 170198 | 193193 | 114120 | 143145 |
| Sag.11, | 134154 | 160184 | 140144 | 190190 | 170170 | 181193 | 114118 | 143145 |
| Sag.11, | 134150 | 136160 | 116144 | 186190 | 186202 | 179205 | 116118 | 145145 |
| Sag.11, | 134154 | 152184 | 116140 | 190194 | 198202 | 181207 | 118120 | 143145 |
| Sag.11, | 134154 | 184192 | 116140 | 190198 | 170170 | 193201 | 114118 | 143143 |
| Sag.11, | 134154 | 136160 | 136144 | 198198 | 170170 | 193193 | 118118 | 145145 |
| Sag.11, | 134154 | 160184 | 116140 | 190198 | 198202 | 181207 | 114118 | 143143 |
| Sag.11, | 134134 | 152176 | 116136 | 194198 | 170170 | 179179 | 114116 | 145145 |
| Sag.11, | 134138 | 136192 | 116128 | 190198 | 170198 | 193201 | 114118 | 143143 |
| Sag.11, | 134134 | 136184 | 116128 | 194202 | 194202 | 193205 | 108118 | 143145 |
| Sag.11, | 134154 | 136152 | 116144 | 190198 | 170170 | 193193 | 118118 | 145145 |
| Sag.11, | 134134 | 160184 | 116140 | 190198 | 170170 | 193193 | 118118 | 145145 |
| Sag.11, | 134134 | 136152 | 116128 | 190202 | 170194 | 193205 | 118118 | 145145 |
| Sag.11, | 134134 | 152156 | 116144 | 194194 | 170182 | 193193 | 114116 | 143145 |
| Sag.11, | 134134 | 152160 | 116144 | 198198 | 170170 | 193193 | 116118 | 143145 |
| Sag.11, | 134134 | 152180 | 140144 | 190198 | 198202 | 193207 | 114120 | 143143 |
| Sag.11, | 134138 | 136160 | 116144 | 186190 | 170186 | 179205 | 114116 | 145145 |
| Sag.11, | 134138 | 136180 | 128132 | 194202 | 170198 | 193205 | 114118 | 145145 |
| Sag.11, | 134134 | 152180 | 140144 | 190190 | 170170 | 181207 | 114118 | 143145 |
| Sag.11, | 150150 | 136160 | 128144 | 190194 | 194198 | 179193 | 114116 | 143145 |
| Sag.11, | 134154 | 136152 | 116132 | 190198 | 170170 | 179193 | 108114 | 145145 |
| Sag.11, | 142154 | 136160 | 136144 | 198198 | 170170 | 179193 | 114114 | 143145 |
| Sag.11, | 134154 | 136180 | 116140 | 190194 | 202202 | 193193 | 118118 | 143143 |
| Sag.11, | 134138 | 152160 | 136144 | 190194 | 198198 | 193207 | 118120 | 143145 |
| Sag.11, | 154154 | 152152 | 116136 | 194198 | 194198 | 193205 | 114114 | 143145 |
| Sag.11, | 134150 | 156192 | 116128 | 194198 | 170170 | 205207 | 116118 | 143145 |
| Sag.11, | 134134 | 160180 | 116140 | 190198 | 170198 | 193207 | 118118 | 145145 |
| Sag.11, | 134154 | 152180 | 140144 | 194198 | 170170 | 181193 | 114120 | 143145 |
| Sag.11, | 134154 | 160184 | 116116 | 190194 | 166170 | 193205 | 118118 | 139143 |
| POP     |        |        |        |        |        |        |        |        |
| Sag.12, | 154154 | 152184 | 128144 | 190190 | 170170 | 193235 | 114118 | 143143 |
| Sag.12, | 134134 | 152192 | 116136 | 194198 | 170194 | 179193 | 114116 | 143145 |
| Sag.12, | 134150 | 136180 | 140144 | 194198 | 170202 | 193193 | 118118 | 139143 |
| Sag.12, | 134142 | 148152 | 116144 | 194198 | 170198 | 193193 | 114116 | 139145 |
| Sag.12, | 134150 | 152160 | 140144 | 190198 | 170170 | 193193 | 114118 | 143145 |
| Sag.12, | 142154 | 152192 | 144144 | 194198 | 170182 | 179193 | 116118 | 145145 |
| Sag.12, | 134154 | 136160 | 116144 | 190194 | 170194 | 179193 | 114114 | 139143 |
| Sag.12, | 134154 | 152188 | 132140 | 194198 | 170170 | 181193 | 114118 | 143145 |
| Sag.12, | 142154 | 152160 | 144144 | 194198 | 166182 | 179193 | 116118 | 145145 |
| Sag.12, | 134160 | 152156 | 116136 | 194198 | 166198 | 191205 | 116118 | 143145 |
| Sag.12, | 134134 | 152180 | 116140 | 190194 | 198202 | 181207 | 118118 | 143145 |
| Sag.12, | 142150 | 160192 | 116136 | 198234 | 170194 | 193205 | 114116 | 145145 |

|         |        |        |        |        |        |        |        |        |
|---------|--------|--------|--------|--------|--------|--------|--------|--------|
| Sag.12, | 142154 | 152160 | 116144 | 190198 | 170170 | 193205 | 116118 | 143145 |
| Sag.12, | 134154 | 136184 | 128136 | 194198 | 170198 | 179235 | 114118 | 143143 |
| Sag.12, | 150154 | 136160 | 116128 | 198230 | 174198 | 183205 | 114118 | 143145 |
| Sag.12, | 134142 | 152160 | 116144 | 194198 | 166170 | 179193 | 116118 | 145145 |
| Sag.12, | 134142 | 136156 | 116132 | 194194 | 170202 | 193205 | 118118 | 143145 |
| Sag.12, | 134134 | 152184 | 124144 | 190194 | 198198 | 205205 | 114116 | 139139 |
| Sag.12, | 134150 | 152184 | 140140 | 194198 | 182182 | 193193 | 114118 | 145145 |
| Sag.12, | 134154 | 152180 | 140144 | 194198 | 166170 | 181193 | 118118 | 143145 |
| Sag.12, | 134154 | 136188 | 116136 | 190194 | 202202 | 193205 | 114116 | 145145 |
| Sag.12, | 134142 | 136148 | 132140 | 194194 | 166202 | 193205 | 114116 | 143143 |
| Sag.12, | 134150 | 156184 | 116140 | 190194 | 166178 | 179193 | 114118 | 139139 |
| Sag.12, | 134150 | 148152 | 116144 | 194198 | 170198 | 179193 | 116118 | 139143 |
| Sag.12, | 134134 | 136152 | 116132 | 190198 | 170170 | 179193 | 114114 | 145145 |
| Sag.12, | 134154 | 136160 | 116116 | 198230 | 170198 | 193205 | 114116 | 143145 |
| Sag.12, | 142154 | 136152 | 116144 | 190198 | 170170 | 193205 | 114116 | 143145 |
| Sag.12, | 134154 | 136152 | 116144 | 194194 | 170202 | 000000 | 116118 | 143145 |
| Sag.12, | 134154 | 136152 | 116136 | 190194 | 198202 | 193193 | 118118 | 143143 |
| Sag.12, | 134150 | 156164 | 128144 | 190198 | 170202 | 205207 | 116118 | 143145 |
| Sag.12, | 142154 | 152160 | 116144 | 190198 | 170182 | 193205 | 116118 | 143145 |
| Sag.12, | 134154 | 148184 | 116144 | 230230 | 170182 | 179207 | 108114 | 145145 |
| Sag.12, | 134142 | 152156 | 136144 | 194194 | 166194 | 193193 | 114118 | 145145 |
| Sag.12, | 134134 | 136160 | 132144 | 194194 | 170170 | 181205 | 114118 | 143145 |
| Sag.12, | 134150 | 152184 | 144144 | 198198 | 174198 | 179193 | 118118 | 145145 |
| Sag.12, | 134154 | 156192 | 116116 | 194194 | 166190 | 179201 | 116116 | 143145 |
| Sag.12, | 134154 | 148152 | 116132 | 194230 | 166170 | 193193 | 114118 | 143145 |
| Sag.12, | 134154 | 152184 | 132140 | 194198 | 170202 | 193193 | 118118 | 143143 |
| Sag.12, | 134150 | 136152 | 116144 | 230242 | 174198 | 179179 | 114114 | 139145 |
| Sag.12, | 134154 | 148180 | 132140 | 194198 | 166202 | 193193 | 118120 | 143145 |
| Sag.12, | 134154 | 148180 | 132140 | 190194 | 170202 | 193193 | 114120 | 143145 |
| Sag.12, | 134134 | 160184 | 140144 | 190198 | 170198 | 181193 | 114118 | 145145 |
| Sag.12, | 134134 | 152180 | 132140 | 190194 | 166170 | 193205 | 118118 | 143143 |
| Sag.12, | 134154 | 136152 | 116140 | 198198 | 170174 | 179193 | 114114 | 139139 |
| Sag.12, | 134134 | 152180 | 140144 | 190194 | 170202 | 181205 | 114118 | 145145 |
| Sag.12, | 134150 | 152184 | 132140 | 194198 | 170202 | 181205 | 114118 | 143143 |
| Sag.12, | 150150 | 136152 | 116128 | 194194 | 170170 | 193193 | 108114 | 139145 |
